# Supplementary figures and images for: Hypoxia Enhances Glioma Resistance to Sulfasalazine‐Induced Ferroptosis by Upregulating SLC7A11 via PI3K/AKT/HIF‐1α Axis
Source: Hindawi journal article supplement (doi:10.1155/2022/7862430), 2022-01-01

A

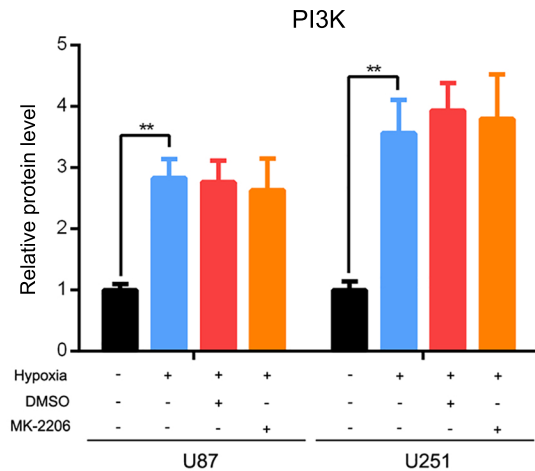

B

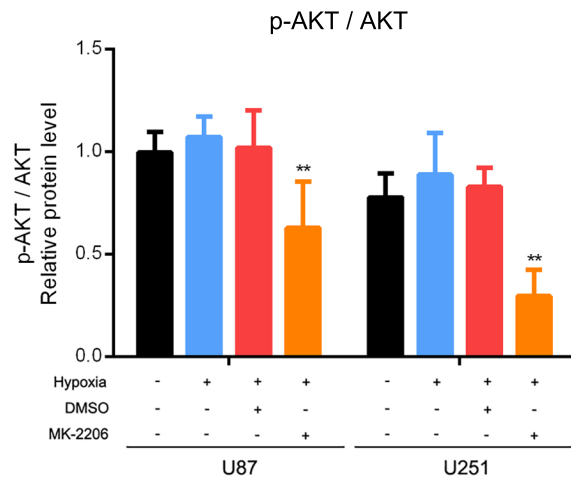

C

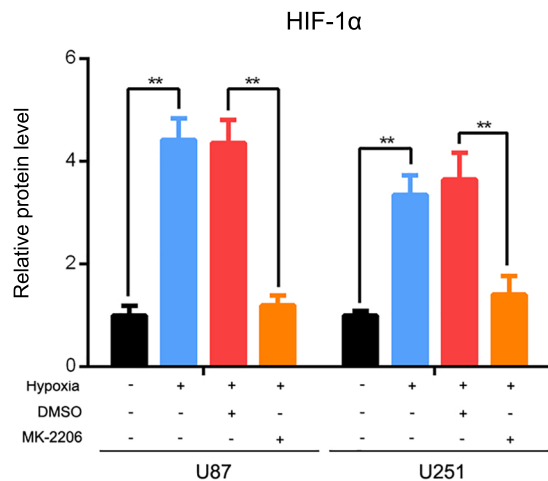

D

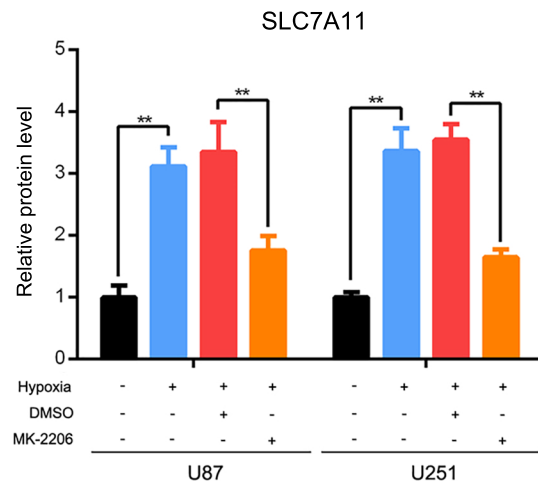

Supplement: f1 [file 7862430.f1.zip]

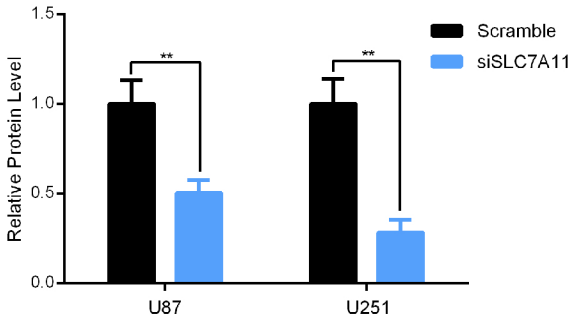

Supplement: f1 [file 7862430.f1.zip]

A

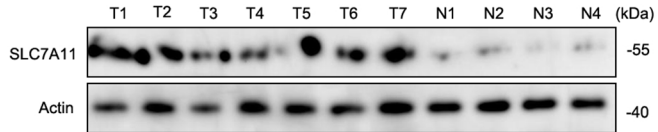

B

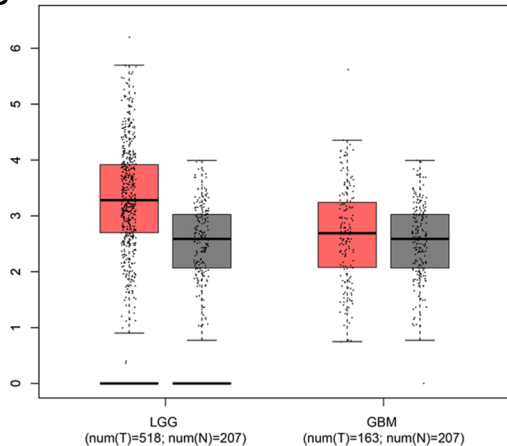

Supplement: f1 [file 7862430.f1.zip]

A

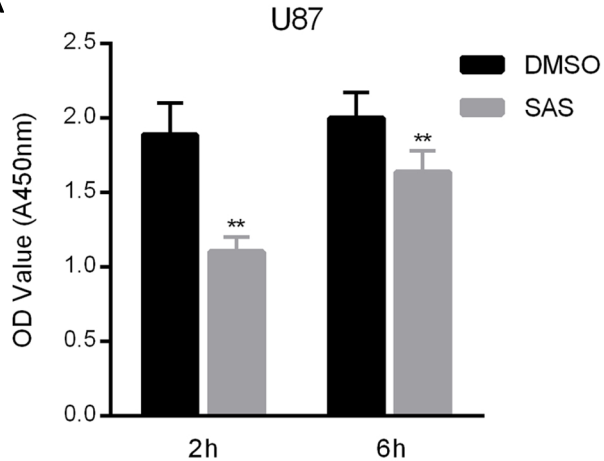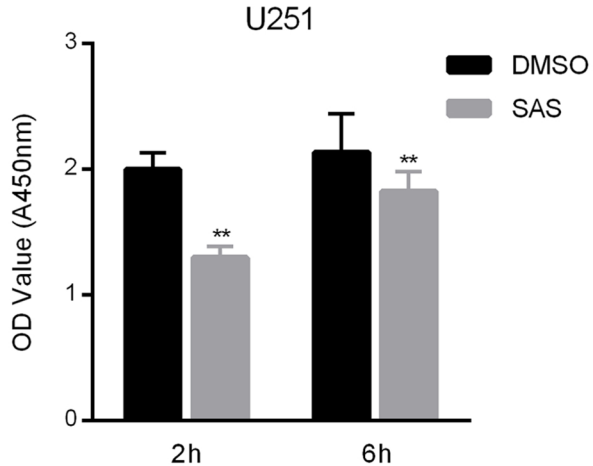

Supplement: f1 [file 7862430.f1.zip]
